# Supplementary material
Source: PubMed Central journal article supplement (PMC1538811)
Supplement: nar_34_suppl-2_W24__1.pdf [file nar_34_suppl-2_W24__1.pdf]

### Power method for calculating the B-factors (PowerB)

The calculation of  $B_i^{GNM}$  requires complete eigenvalue decomposition of the Kirchhoff matrix  $\Gamma$ , the computing time of which scales with  $N^3$ , making the solution intractable for large networks. Because  $\Gamma$  has one zero eigenvalue ( $\lambda_0$ ), its decomposition can be written as

$$\Gamma = 0 \times \mathbf{u}_0 \mathbf{u}_0^T + \sum_{j=1}^{N-1} \lambda_j \mathbf{u}_j \mathbf{u}_j^T \quad (\text{S1})$$

If we perturb  $\Gamma$  by adding a small number,  $\varepsilon = 10^{-4}$ , to the first element,  $\Gamma_{11}$ , the new matrix,  $\Gamma'$ , becomes invertible. Let us denote the inverse of  $\Gamma'$  by  $A$ ; the  $N$  eigenvalues of  $A$  can be ordered as:  $|\lambda'_0| > |\lambda'_1| \geq |\lambda'_2| \geq \dots \geq |\lambda'_{N-1}|$  where  $\lambda'_0$  is the dominant eigenvalue

(replacing  $1/\lambda_0$ ). Because  $A$  has dominant eigenvalue, it is possible to employ the power method (Wilkinson, 1965) to solve for a subset of dominant eigenvectors. Mainly, the product of  $A$  with any  $N$ -dimensional vector,  $\mathbf{X}_0$ , is expressed in terms of  $A$ 's eigenvalues,  $\lambda'_i$ , and associated eigenvectors,  $\mathbf{v}_i$ , as

$$\mathbf{A}\mathbf{X}_0 = \sum_{i=0}^{N-1} C_i \lambda'_i \mathbf{v}_i \quad (\text{S2})$$

and repeating this multiplication  $k$  times, we obtain  $\mathbf{A}^k \mathbf{X}_0 \approx \lambda'_0{}^k C_0 \mathbf{v}_0$ , as  $(\lambda'_i / \lambda'_0)^k \rightarrow 0$  for large  $k$ , and  $i \neq 0$ . The normalized eigenvector  $\mathbf{v}_0$  is obtained from  $\mathbf{X}_0$  using

$$\mathbf{v}_0 = \frac{\mathbf{A}^k \mathbf{X}_0}{|\mathbf{A}^k \mathbf{X}_0|} \quad (\text{S3})$$

and the eigenvalue is deduced from the inner product of Equation 4 with a normalized random vector  $\mathbf{Y}$  using the ratio

$$\frac{\mathbf{A}^{k+1} \mathbf{X}_0 \cdot \mathbf{Y}}{\mathbf{A}^k \mathbf{X}_0 \cdot \mathbf{Y}} = \frac{\lambda'_0{}^{k+1}}{\lambda'_0{}^k} = \lambda'_0 \quad (\text{S4})$$

provided that  $\mathbf{X}_0$  and  $\mathbf{Y}$  are not orthogonal. This method can be used to estimate the leading eigenvalues and eigenvectors for a fixed number of iterations (e.g.  $k = 100$ ) through a deflation process, when the difference between consecutive iterations is smaller than a threshold ( $\delta = 10^{-7}$ ). The convergence rate depends upon the ratio of the dominant eigenvalue to the next largest eigenvalue, but in general, the computing time is in the order of  $N^2$  for the first 10 modes.

We note that the pseudo-inverse of  $\Gamma$  is related to  $A$  simply by  $\Gamma^{-1} \cong A - \lambda'_0 \mathbf{u}_0 \mathbf{u}_0^T$  which provides us with an efficient method to estimate  $B_i^{GNM}$  using

$$B_i^{GNM} \cong \frac{8\pi^2 k_B T}{\gamma} [A - \lambda'_0 \mathbf{u}_0 \mathbf{u}_0^T]_{ii} \quad (\text{S5})$$

We term this fast algorithm for calculating  $B_i^{GNM}$  the *PowerB* method.

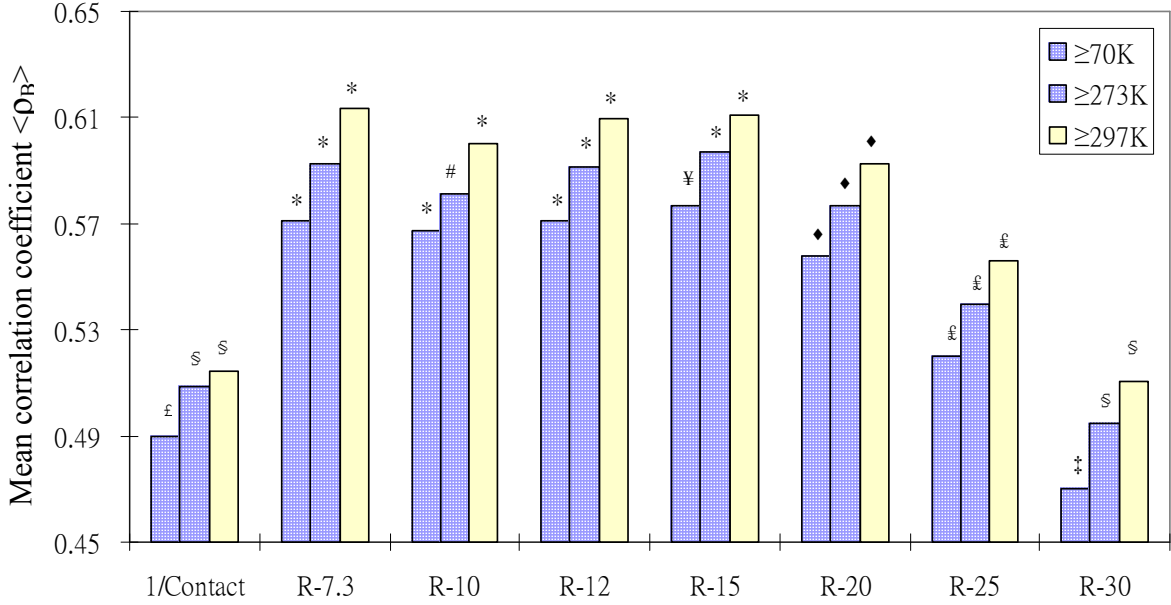

**Figure S1. Correlation coefficients  $\langle \rho_B \rangle$  between experimental and theoretical B-factors.** Results are shown as a function of cutoff distance ( $r_c$ ) for discrete values along the abscissa and X-ray diffraction temperatures (XDT), averaged over 1250 non homologous proteins. The different colored bars refer to subsets of structures determined at XDT  $\geq 70$  K (all structures; blue bars), XDT  $\geq 273$  K (235 structures; dark red), and XDT  $\geq 297$  K (59 structures; yellow). The first set of results (labeled as 1/Contact) refers to the correlation  $\langle \rho \rangle$  between  $B^{exp}$  and the inverse residue coordination number ( $1/\Gamma_{ii}$ ) averaged over all proteins, based on a cutoff distance of 7.3 Å. The average  $\langle \rho_B \rangle$  are computed using *PowerB* approach. The mean  $\langle \rho_B \rangle$  values of different groups are considered statistically identical by a paired student t-test if the symbols above the group columns are the same. Groups with different symbols have statistically different mean values.

These results show that the GNM results are rather insensitive to  $r_c$  in the range  $7.3 \leq r_c \leq 15$  Å. Another interesting observation is the higher correlation with experiments observed in the case of higher XDTs, indicating that the GNM results agree better with experiments when the structures are subject to less constrained (or larger) fluctuations. At  $r_c = 7.3$  Å, the force/spring constant averaged over all structures is found to be  $k_B T / \gamma =$

$1.10 \pm 0.50 \text{ \AA}^2$  in close agreement with the result of  $k_B T / \gamma = 0.87 \pm 0.46 \text{ \AA}^2$  obtained for a set of 113 monomeric proteins (28). This spring constant provides a measure of a generic ‘stiffness’ that controls residue fluctuations in folded proteins.

**Supplemental Table 1. 1250 proteins used in the study of cutoff distances (*Figure S1*)**

12as, 1a0b, 1a12, 1a1x, 1a28, 1a32, 1a3k, 1a49, 1a4i, 1a53, 1a6j, 1a6m, 1a76, 1a79, 1a7w, 1a8d, 1a8e, 1a8h, 1a8l, 1a8p, 1aa7, 1ad6, 1ado, 1af7, 1afr, 1agq, 1ah7, 1ail, 1aj2, 1aj8, 1ajs, 1ak0, 1ako, 1amf, 1amm, 1amx, 1aoc, 1aq0, 1aqt, 1ass, 1atz, 1au1, 1aui, 1ava, 1avq, 1ayo, 1az9, 1azs, 1b00, 1b0y, 1b2p, 1b33, 1b35, 1b3a, 1b3u, 1b4p, 1b5e, 1b5p, 1b63, 1b74, 1b77, 1b7g, 1b8a, 1b8o, 1b9h, 1b9w, 1baz, 1bbz, 1bd0, 1bd3, 1bd8, 1bea, 1beb, 1beh, 1bf2, 1bf6, 1bfd, 1bfg, 1bgv, 1bhe, 1bht, 1bif, 1bis, 1bja, 1bk5, 1bkr, 1bm8, 1bn8, 1bol, 1bou, 1bqk, 1bqs, 1br9, 1brf, 1brt, 1bt4, 1btn, 1bu7, 1bwv, 1bxa, 1bxr, 1byq, 1byr, 1c02, 1c0p, 1c1k, 1c1l, 1c30, 1c39, 1c4q, 1c52, 1c5e, 1c5k, 1c7j, 1c7k, 1c7q, 1c7s, 1c8k, 1c8u, 1c96, 1c9o, 1ca1, 1cbf, 1cc8, 1ccw, 1ccz, 1cdk, 1cfr, 1cfz, 1chk, 1cip, 1cjc, 1cjw, 1cjsx, 1cnz, 1coz, 1cp2, 1cpq, 1cq3, 1cqk, 1cqx, 1cqy, 1cru, 1cs6, 1ctq, 1cun, 1cv8, 1cvr, 1cwv, 1cy5, 1cz3, 1cz9, 1cza, 1d09, 1d0c, 1d0q, 1d1m, 1d1q, 1d2o, 1d2u, 1d3b, 1d4o, 1d4t, 1d4v, 1d7p, 1d7u, 1d9c, 1dbf, 1dbt, 1dce, 1dci, 1dd4, 1ddz, 1de6, 1del, 1dfx, 1dgw, 1dj0, 1djn, 1djt, 1dk0, 1dk8, 1dkq, 1dlj, 1dlw, 1dmh, 1dmr, 1dmt, 1dos, 1doz, 1dp0, 1dp4, 1dq3, 1dqa, 1dqe, 1dqg, 1dqi, 1dqp, 1dqt, 1dqw, 1ds1, 1dtd, 1dvo, 1dx5, 1dxe, 1dy9, 1dz3, 1dzf, 1dzi, 1dzk, 1e0b, 1e19, 1e1a, 1e29, 1e30, 1e39, 1e3u, 1e44, 1e4c, 1e59, 1e6i, 1e6p, 1e6u, 1e79, 1e9e, 1eai, 1eaj, 1eao, 1eaz, 1eb6, 1ebf, 1ecs, 1ed1, 1edg, 1edq, 1ee6, 1ee8, 1eej, 1eeo, 1eer, 1eex, 1efv, 1efy, 1eg3, 1ega, 1ehd, 1ei1, 1ei9, 1ej2, 1ekg, 1el6, 1elk, 1em9, 1eo9, 1eoi, 1eok, 1ep3, 1ep9, 1eqf, 1erz, 1es5, 1esj, 1esw, 1ete, 1eu3, 1eu8, 1eua, 1euc, 1eum, 1euv, 1evh, 1ew0, 1ew4, 1ew6, 1ex1, 1ex2, 1ex7, 1ext, 1ey4, 1eyh, 1eyq, 1eys, 1eyv, 1ezg, 1ezv, 1f00, 1f08, 1f0j, 1f0k, 1f20, 1f24, 1f2d, 1f2t, 1f2u, 1f2v, 1f39, 1f3m, 1f46, 1f4l, 1f5m, 1f5v, 1f60, 1f7d, 1f7s, 1f82, 1f8e, 1f8m, 1f8y, 1fbq, 1fc3, 1fc9, 1fcj, 1fcu, 1fcz, 1ffv, 1fi2, 1fil, 1fj2, 1fjr, 1fk5, 1fkn, 1fl0, 1fl2, 1fle, 1flm, 1flt, 1fm0, 1fm4, 1fn0, 1fn9, 1fnf, 1fns, 1fob, 1fp2, 1fp3, 1fqj, 1fr2, 1fr3, 1fs7, 1fsg, 1ft5, 1fth, 1ftr, 1fur, 1fw1, 1fw9, 1fxk, 1fxq, 1fy7, 1fzc, 1g0o, 1g0s, 1g12, 1g1k, 1g1t, 1g29, 1g2a, 1g2q, 1g2w, 1g3q, 1g40, 1g4y, 1g5b, 1g5c, 1g5t, 1g61, 1g6g, 1g6h, 1g6s, 1g6u, 1g71, 1g72, 1g73, 1g79, 1g8a, 1g8e, 1g8k, 1g8l, 1g8q, 1g97, 1ga6, 1gak, 1gc5, 1gcq, 1gd0, 1gd8, 1gdv, 1gef, 1gg6, 1gjw, 1gk1, 1gk2, 1gk8, 1gl4, 1gmu, 1gn0, 1gnu, 1gny, 1go4, 1got, 1gp0, 1gp2, 1gpe, 1gpi, 1gpq, 1gpu, 1gpw, 1gqi, 1gqn, 1gqv, 1gqy, 1gs5, 1gs9, 1gtz, 1gu2, 1gu3, 1gu7, 1gui, 1gux, 1gv4, 1gvc, 1gvj, 1gvn, 1gvp, 1gvr, 1gwy, 1gxj, 1gxm, 1gxy, 1gy6, 1gyj, 1gzf, 1gzs, 1h03, 1h09, 1h0o, 1h1y, 1h2b, 1h2c, 1h2w, 1h34, 1h3o, 1h3q, 1h4g, 1h4i, 1h4k, 1h4p, 1h4r, 1h4y, 1h59, 1h6d, 1h6h, 1h6l, 1h6t, 1h6w, 1h70, 1h7e, 1h7w, 1h8e, 1h8p, 1h8u, 1h9s, 1ha4, 1hb6, 1hbk, 1hbn, 1hd2,

1hdk, 1he1, 1hf2, 1hf8, 1hh2, 1hhs, 1hi9, 1hk9, 1hkf, 1hp1, 1hq0, 1hqk, 1hs6, 1hsj, 1hsk,  
 1ht9, 1htw, 1huf, 1hw5, 1hw7, 1hxa, 1hxs, 1hyo, 1hzd, 1hzi, 1hzt, 1i07, 1i0d, 1i0r, 1i0z,  
 1i1d, 1i1i, 1i1n, 1i1r, 1i1x, 1i27, 1i2a, 1i2k, 1i2t, 1i39, 1i4g, 1i4j, 1i4m, 1i4u, 1i5r, 1i6a,  
 1i6p, 1i71, 1i76, 1i7n, 1i7p, 1i7q, 1i8d, 1i8o, 1i8t, 1i9d, 1i9g, 1ia9, 1iak, 1iam, 1iap, 1iat,  
 1ib2, 1ic6, 1icf, 1icr, 1idp, 1ifg, 1ig0, 1ig8, 1ihg, 1ihr, 1ii7, 1ijy, 1ik7, 1ikt, 1im3, 1imj,  
 1in0, 1inl, 1io0, 1io1, 1io7, 1ioo, 1iow, 1iq4, 1iq6, 1iq8, 1iqz, 1ird, 1ire, 1irj, 1is1, 1isi,  
 1isp, 1it2, 1itu, 1itv, 1itw, 1iu1, 1iu8, 1iuj, 1iuk, 1iup, 1iv3, 1ivu, 1iwm, 1iye, 1iyh, 1iyk,  
 1ize, 1izn, 1j09, 1j0m, 1j0p, 1j18, 1j1b, 1j1j, 1j1n, 1j1t, 1j1y, 1j24, 1j2j, 1j2l, 1j2r, 1j2z,  
 1j30, 1j33, 1j34, 1j4a, 1j6r, 1j71, 1j7d, 1j84, 1j8e, 1j8q, 1j8u, 1j96, 1j9j, 1ja1, 1jak, 1jbc,  
 1jbo, 1jc5, 1jc9, 1jcl, 1jd5, 1jdf, 1jdw, 1je1, 1jet, 1jf2, 1jf8, 1jf9, 1jfl, 1jfr, 1jfu, 1jfx, 1jgz,  
 1jg9, 1jgs, 1jh6, 1jhf, 1jhj, 1jhs, 1ji1, 1jig, 1jiw, 1jjf, 1jk7, 1jke, 1jkg, 1jl1, 1jl5, 1jl7, 1jlt,  
 1jlv, 1jly, 1jmj, 1jnr, 1jo0, 1jo8, 1job, 1joc, 1jou, 1jpe, 1jqb, 1jqj, 1jr2, 1jr8, 1js1, 1jtd,  
 1jtg, 1jtk, 1ju2, 1juv, 1jx6, 1jye, 1jyh, 1jyo, 1k04, 1k12, 1k1a, 1k20, 1k2e, 1k2x, 1k32,  
 1k3b, 1k3r, 1k3y, 1k46, 1k4g, 1k4i, 1k4m, 1k4z, 1k66, 1k6w, 1k7c, 1k7h, 1k7i, 1k7w,  
 1k94, 1k9k, 1ka2, 1kaf, 1kbl, 1kcm, 1kdg, 1kek, 1kfr, 1kg2, 1kgn, 1kh0, 1khi, 1kiy, 1kkh,  
 1kkt, 1kl1, 1knc, 1knl, 1ko3, 1ko5, 1koe, 1kol, 1kp6, 1kp8, 1kpf, 1kph, 1kq1, 1kq3, 1kqp,  
 1kr7, 1krh, 1ks8, 1kt6, 1kuu, 1kv9, 1kwg, 1kxg, 1kyf, 1kzq, 1l0g, 1l0i, 1l0w, 1l3a, 1l3j,  
 1l5j, 1l6w, 1l6x, 1lam, 1lbq, 1lbv, 1ld8, 1ldg, 1lf2, 1lf6, 1lfd, 1lh0, 1lhp, 1lj5, 1lj9, 1lk2,  
 1lk5, 1lkd, 1llf, 1lo7, 1lov, 1lp1, 1lpl, 1lq8, 1lq9, 1lqb, 1lr5, 1lsl, 1ltu, 1lvf, 1lw3, 1lw6,  
 1lxk, 1lxy, 1lxz, 1ly1, 1ly2, 1lyc, 1lyv, 1lzl, 1m15, 1m2d, 1m2k, 1m2r, 1m2t, 1m3k,  
 1m4i, 1m4j, 1m4r, 1m4y, 1m50, 1m55, 1m5w, 1m6j, 1m70, 1m76, 1m93, 1m98, 1m9z,  
 1mai, 1mb4, 1mb8, 1mbm, 1mbx, 1mby, 1md6, 1mdu, 1me3, 1mfl, 1mg4, 1mgq, 1mgt,  
 1mgv, 1mh9, 1mhl, 1mhn, 1mhq, 1mhw, 1mix, 1mjg, 1mju, 1mk0, 1mk4, 1mkf, 1mkk,  
 1mkm, 1ml4, 1mn8, 1mo9, 1mog, 1moo, 1moq, 1mqk, 1msk, 1mtp, 1mty, 1mug, 1mum,  
 1mvm, 1mwk, 1mwp, 1mww, 1mxr, 1my7, 1mzj, 1n08, 1n0q, 1n1e, 1n1j, 1n26, 1n2a,  
 1n2s, 1n31, 1n52, 1n5d, 1n5u, 1n67, 1n69, 1n71, 1n7e, 1n81, 1n83, 1n8f, 1n8j, 1n8k,  
 1n8n, 1n9l, 1nbf, 1nbu, 1nbw, 1nc1, 1nc5, 1ncw, 1nd4, 1nd6, 1nd7, 1ndd, 1ne9, 1nep,  
 1nez, 1nf5, 1nf9, 1ng2, 1ng4, 1ng5, 1ng6, 1nhw, 1nij, 1njg, 1nkr, 1nln, 1nm8, 1nmp,  
 1nmu, 1nof, 1noy, 1np3, 1np6, 1np8, 1npe, 1nr5, 1nrz, 1nsf, 1nsj, 1nsx, 1nte, 1ntm, 1ntv,  
 1nu7, 1nv0, 1nvj, 1nvm, 1nwa, 1nyt, 1nzo, 1o0s, 1o0w, 1o0y, 1o26, 1o3x, 1o4r, 1o4t,  
 1o4y, 1o5u, 1o6e, 1o7i, 1o7n, 1o7v, 1o7z, 1o8x, 1o9h, 1o9i, 1o9r, 1o9s, 1oa8, 1oaa, 1oai,  
 1oao, 1oap, 1obn, 1obo, 1ock, 1ocx, 1ocy, 1od3, 1oe0, 1oej, 1ofs, 1ofu, 1oga, 1ogd, 1ogi,  
 1ogq, 1ogv, 1oh0, 1ohl, 1oi4, 1oia, 1oio, 1oiz, 1oja, 1ojx, 1okq, 1okr, 1omr, 1on2, 1on3,  
 1onq, 1ons, 1oo0, 1ooe, 1ooh, 1opc, 1opk, 1opm, 1oqq, 1or7, 1orj, 1orr, 1orv, 1osy, 1ot5,  
 1otk, 1ov9, 1ow4, 1ow6, 1ox0, 1oxj, 1oz2, 1oz9, 1ozn, 1plj, 1plm, 1p36, 1p38, 1p3u,  
 1p4k, 1p4o, 1p4x, 1p6o, 1p80, 1p8c, 1p99, 1p9a, 1p9l, 1p9y, 1pa7, 1pb1, 1pcf, 1pdo,  
 1pdq, 1pgt, 1pil, 1pix, 1pjc, 1pju, 1pk6, 1pkh, 1pl3, 1pm4, 1pmm, 1po5, 1ppr, 1prg,  
 1ps9, 1psr, 1pt1, 1pt7, 1pvm, 1pvy, 1pwb, 1pxf, 1pxr, 1py9, 1pyo, 1pz4, 1pzw, 1pzx,

1q08, 1q0e, 1q0n, 1q0r, 1q16, 1q19, 1q2y, 1q3o, 1q3q, 1q4k, 1q4u, 1q5z, 1q7f, 1q7l,  
 1q98, 1qa7, 1qam, 1qaz, 1qb0, 1qb2, 1qb5, 1qb7, 1qc7, 1qcx, 1qd9, 1qdv, 1qex, 1qft,  
 1qge, 1qgi, 1qgo, 1qgx, 1qh5, 1qhd, 1qho, 1qhq, 1qhv, 1qhw, 1qi7, 1qi9, 1qip, 1qjc, 1qks,  
 1qkt, 1ql0, 1ql6, 1qla, 1qlm, 1qmg, 1qmy, 1qnf, 1qnr, 1qnx, 1qo3, 1qoy, 1qpo, 1qqf,  
 1qqh, 1qqm, 1qqp, 1qqr, 1qr0, 1qsa, 1qsd, 1qsm, 1qst, 1qtn, 1qto, 1qtr, 1qtw, 1qvb, 1qvc,  
 1qw9, 1qxr, 1qyc, 1qyn, 1qyo, 1qz9, 1r0r, 1r29, 1r31, 1r4a, 1r5r, 1r5z, 1r6x, 1r89, 1r8q,  
 1r8s, 1ra9, 1rf6, 1rfs, 1ri5, 1ri6, 1rie, 1rif, 1rj1, 1rj8, 1rjd, 1rkd, 1rl6, 1rlk, 1rmd, 1rmg,  
 1ro0, 1roc, 1rr9, 1rtq, 1rw7, 1rwz, 1ryp, 1s0p, 1s3i, 1s7j, 1scj, 1skz, 1smt, 1spp, 1srv,  
 1sur, 1tfe, 1thf, 1tl2, 1toa, 1tvx, 1tx4, 1tyf, 1uad, 1uas, 1ubk, 1uca, 1uds, 1udv, 1ueh,  
 1uek, 1uf6, 1ufb, 1ufh, 1ufi, 1ug6, 1ugx, 1uhv, 1ui0, 1uiu, 1uku, 1unn, 1uoh, 1uok, 1uol,  
 1uoy, 1uq5, 1urs, 1usg, 1usl, 1uso, 1uuz, 1v3e, 1v7c, 1v7r, 1v7z, 1v8c, 1vfy, 1vie, 1vj2,  
 1vps, 1vsr, 1wdc, 1wer, 1whi, 1who, 1wwc, 1xgs, 1xva, 1xwl, 1yac, 1yge, 1yvs, 1zei,  
 1zin, 1zpd, 2azo, 2cb5, 2cmk, 2cpg, 2e2a, 2fcb, 2fha, 2gsa, 2hgs, 2hrv, 2hvm, 2igd, 2kin,  
 2lis, 2mas, 2ptd, 2pth, 2rbi, 2sak, 2scu, 2sli, 2sqc, 2tdx, 2tnf, 2tps, 2wea, 2yas, 3chb, 3eip,  
 3fap, 3ran, 3thi, 3tss, 3vub, 4eug, 4lzt, 4ubp, 6fiv, 7fd1, 7taa

**Supplemental Table 2. Set of 64 nucleotide/nucleotide-protein complexes.**

| PDBid | residues | nucleotides | Resolution (Å) | name                                  |
|-------|----------|-------------|----------------|---------------------------------------|
| 1cx0  | 95       | 72          | 2.30           | Hepatitis $\delta$ virus ribozyme     |
| 1drz  | 95       | 72          | 2.30           | Hepatitis $\delta$ virus ribozyme     |
| 1m5k  | 184      | 226         | 2.40           | rProtein A – hairpin ribozyme complex |
| 1u6b  | 95       | 222         | 3.10           | Group I intron                        |
| 1hr2  | 0        | 315         | 2.25           | P4-P6 ribozyme domain                 |
| 1l8v  | 0        | 314         | 2.80           | P4-P6 ribozyme domain                 |
| 1u9s  | 0        | 155         | 2.90           | Ribonuclease P                        |
| 1y0q  | 0        | 234         | 3.60           | Group I ribozyme                      |
| 1gid  | 0        | 316         | 2.50           | P4-P6 ribozyme domain                 |
| 1nbs  | 0        | 270         | 3.15           | Ribonuclease P                        |
| 1y26  | 0        | 72          | 2.10           | A-riboswitch                          |
| 1egk  | 0        | 108         | 3.10           | Nucleic acid four-way junction        |
| 1ehz  | 0        | 76          | 1.93           | Phenylalanine tRNA                    |
| 1evv  | 0        | 76          | 2.00           | Phenylalanine tRNA                    |
| 1fir  | 0        | 76          | 3.30           | HIV reverse-transcription primer tRNA |
| 1i9v  | 0        | 76          | 2.60           | tRNA-neomycin B complex               |
| 1tn2  | 0        | 77          | 3.00           | Phenylalanine tRNA                    |
| 1tra  | 0        | 76          | 3.00           | Phenylalanine tRNA                    |
| 2tra  | 0        | 74          | 3.00           | Aspartic acid tRNA                    |
| 3tra  | 0        | 72          | 3.00           | Aspartic acid tRNA                    |
| 4tra  | 0        | 76          | 3.00           | Phenylalanine tRNA                    |
| 1yfg  | 0        | 75          | 3.00           | Initiator tRNA                        |
| 1qf6  | 641      | 77          | 2.90           | Threonyl-tRNA synthetase-tRNA         |
| 1qu3  | 880      | 76          | 2.90           | Isoleucyl-tRNA synthetase-tRNA        |
| 1qu2  | 917      | 76          | 2.20           | Isoleucyl-tRNA synthetase-tRNA        |
| 1c0a  | 586      | 79          | 2.40           | Aspartyl-tRNA synthetase-tRNA         |
| 1efw  | 1160     | 146         | 3.00           | Aspartyl-tRNA synthetase-tRNA         |
| 1f7u  | 607      | 76          | 2.20           | Arginyl-tRNA synthetase-tRNA          |
| 1ffy  | 917      | 76          | 2.20           | Isoleucyl-tRNA synthetase-tRNA        |
| 1h4s  | 948      | 69          | 2.85           | Prolyl-tRNA synthetase-tRNA           |
| 1j1u  | 300      | 74          | 1.95           | Trosyl-tRNA synthetase-tRNA           |
| 1j2b  | 1152     | 148         | 3.30           | tRNA-Guanine tansglycosylase-tRNA     |
| 1o0c  | 530      | 75          | 2.70           | Glutaminyl-tRNA synthetase            |
| 1rc7  | 220      | 41          | 2.15           | Ribonuclease III – dsRNA complex      |
| 1u0b  | 461      | 74          | 2.30           | Cysteinyl-tRNA synthetase-tRNA        |
| 1h3e  | 428      | 84          | 2.90           | Tyrosyl-tRNA synthetase-tRNA          |
| 1qtq  | 530      | 75          | 2.25           | Glutaminyl-tRNA synthetase-tRNA       |
| 1gtr  | 529      | 75          | 2.50           | Glutaminyl-tRNA synthetase-tRNA       |
| 1ser  | 793      | 65          | 2.90           | Seryl-tRNA synthetase-tRNA            |
| 1asy  | 980      | 150         | 2.90           | Aspartyl-tRNA synthetase-tRNA         |
| 1qrs  | 529      | 75          | 2.60           | Glutaminyl-tRNA synthetase-tRNA       |
| 1b23  | 406      | 75          | 2.60           | EF-TU – Cys-tRNA complex              |

|      |      |      |      |                                                |
|------|------|------|------|------------------------------------------------|
| 1m5o | 187  | 226  | 2.20 | rProtein A-ribozyme complex                    |
| 1vby | 167  | 73   | 2.90 | rProtein A – hepatitis $\delta$ virus ribozyme |
| 1vc0 | 95   | 73   | 2.50 | rProtein A – hepatitis $\delta$ virus ribozyme |
| 1vc5 | 167  | 70   | 3.40 | rProtein A – hepatitis $\delta$ virus ribozyme |
| 1sj3 | 95   | 73   | 2.20 | rProtein A – hepatitis $\delta$ virus ribozyme |
| 1ttt | 1218 | 231  | 2.70 | EF-TU – Phe-tRNA complex                       |
| 1l9a | 87   | 126  | 2.90 | SRP19 – SRP RNA complex                        |
| 1lng | 87   | 97   | 2.30 | SRP19 – SRP RNA complex                        |
| 1mfq | 215  | 128  | 3.10 | SRP19 – SRP RNA complex                        |
| 1mms | 203  | 116  | 2.57 | rProtein L11 – rRNA fragment complex           |
| 1fg0 | 0    | 499  | 3.00 | Domain V of 23S rRNA                           |
| 1i94 | 2410 | 1514 | 3.20 | 30S ribosomal subunit                          |
| 1j5e | 2396 | 1513 | 3.05 | 30S ribosomal subunit                          |
| 1n32 | 2389 | 2876 | 3.00 | 30S ribosomal subunit                          |
| 1fjg | 2404 | 1507 | 3.00 | 30S ribosomal subunit                          |
| 1ffk | 3656 | 2828 | 2.40 | 50S ribosomal subunit                          |
| 1s72 | 3775 | 2876 | 2.40 | 50S ribosomal subunit                          |
| 1jj2 | 3701 | 2876 | 2.40 | 50S ribosomal subunit                          |
| 1j5a | 385  | 2774 | 3.50 | 50S ribosomal subunit                          |
| 1jzx | 385  | 2774 | 3.10 | 50S ribosomal subunit                          |
| 1yhq | 3775 | 2876 | 2.40 | 50S ribosomal subunit                          |
| 1yij | 3775 | 2876 | 2.60 | 50S ribosomal subunit                          |

## References

Wilkinson, J. H. (1965) *The algebraic eigenvalue problem* Clarendon Press, Oxford.
